# Supplementary material for: Constipation and cardiovascular disease: A two-sample Mendelian randomization analysis
Source: Front Cardiovasc Med. 2023 Feb 24;10:1080982. doi: 10.3389/fcvm.2023.1080982 (PMC9998987; doi:10.3389/fcvm.2023.1080982)
Supplement: Supplementary file 1 [file Data_Sheet_1.xlsx]

## Sheet: S1
Additional file 1: Table S1: Characteristics of the Instrumental SNPs associated with constipation.
SNP	nearest_genes	Chr:pos	effect_allele	other_allele	eaf	beta	se	P_value	R2	F statistic
rs139435626	SUCO	1:172591891	C	A	0.021606	0.148829	0.0310891	1.69153e-06	7.41e-05	22.9169
rs2130630	AL022397.1,SYT14	1:210147954	A	G	0.552163	-0.042405	0.00928588	4.95678e-06	6.75e-05	20.8538
rs35839493	FOXN2	2:48365938	G	A	0.126825	-0.0788129	0.0141515	2.55882e-08	0.000100316	31.0161
rs75650846	C2orf73	2:54366843	T	G	0.000657284	0.731228	0.158884	4.17907e-06	6.85e-05	21.1808
rs113117433	ARL4C	2:234316381	T	C	0.0194605	0.152635	0.032669	2.98057e-06	7.06e-05	21.829
rs116288649	SPEF2	5:35634441	A	G	0.0213291	0.1464	0.031002	2.33206e-06	7.21e-05	22.2997
rs3212690	ITGA2	5:53068131	C	T	0.0218141	0.144368	0.0306494	2.47326e-06	7.18e-05	22.1868
rs182505	SNCAIP	5:122471833	C	T	0.960879	0.121536	0.0247127	8.745e-07	7.82e-05	24.1861
rs27154	GALNT10	5:154362283	G	A	0.678956	0.0462521	0.00997738	3.5573e-06	6.95e-05	21.4895
rs7745923	SAMD5	6:147759298	C	T	0.867607	-0.0634503	0.0135777	2.9664e-06	7.06e-05	21.838
rs1983785	TIAM2	6:154927462	A	C	0.796379	0.0582375	0.0118482	8.86482e-07	7.81e-05	24.1601
rs929294	CHN2	7:29305065	T	G	0.870986	-0.0638651	0.0136316	2.79866e-06	7.1e-05	21.9498
rs4409452	MURC	9:100603021	A	G	0.47001	0.0450713	0.00925998	1.1312e-06	7.66e-05	23.6907
rs146437037	RND1	12:48879432	T	C	0.139952	-0.0617304	0.0135015	4.82803e-06	6.76e-05	20.9041
rs9535583	LINC00371	13:51142085	C	T	0.0625874	-0.09177	0.0195678	2.73401e-06	7.11e-05	21.9945
rs185003380	CYFIP1	15:22927717	T	A	0.173831	-0.0602246	0.0130015	3.61951e-06	6.94e-05	21.4565
rs34165946	CACNG3	16:24431844	T	C	0.164939	-0.0610644	0.012645	1.3712e-06	7.54e-05	23.3204
rs8062158	GOT2	16:59393010	G	A	0.0147189	-0.205205	0.0402276	3.37676e-07	8.42e-05	26.0211
rs576340803	METTL16	17:2491732	G	A	0.0165199	-0.187012	0.0391149	1.74345e-06	7.39e-05	22.8587
rs113664674	TRPM4	19:49171465	A	G	0.0137868	0.181712	0.0381566	1.91434e-06	7.34e-05	22.6791

## Sheet: S2
Additional file 1: Table S2. Instrument variables of coronary artery disease
SNP	effect_allele	other_allele	eaf	beta	se	P_value
rs139435626	C	A	0.021606	0.148829	0.0310891	1.69153e-06
rs35839493	G	A	0.126825	-0.0788129	0.0141515	2.55882e-08
rs75650846	T	G	0.000657284	0.731228	0.158884	4.17907e-06
rs116288649	A	G	0.0213291	0.1464	0.031002	2.33206e-06
rs3212690	C	T	0.0218141	0.144368	0.0306494	2.47326e-06
rs182505	C	T	0.960879	0.121536	0.0247127	8.745e-07
rs27154	G	A	0.678956	0.0462521	0.00997738	3.5573e-06
rs7745923	C	T	0.867607	-0.0634503	0.0135777	2.9664e-06
rs1983785	A	C	0.796379	0.0582375	0.0118482	8.86482e-07
rs929294	T	G	0.870986	-0.0638651	0.0136316	2.79866e-06
rs4409452	A	G	0.47001	0.0450713	0.00925998	1.1312e-06
rs146437037	T	C	0.139952	-0.0617304	0.0135015	4.82803e-06
rs9535583	C	T	0.0625874	-0.09177	0.0195678	2.73401e-06
rs34165946	T	C	0.164939	-0.0610644	0.012645	1.3712e-06
rs8062158	G	A	0.0147189	-0.205205	0.0402276	3.37676e-07

## Sheet: S3
Additional file 1: Table S3. Instrument variables of myocardial infarction
SNP	effect_allele	other_allele	eaf	beta	se	P_value
rs139435626	C	A	0.021606	0.148829	0.0310891	1.69153e-06
rs35839493	G	A	0.126825	-0.0788129	0.0141515	2.55882e-08
rs75650846	T	G	0.000657284	0.731228	0.158884	4.17907e-06
rs113117433	T	C	0.0194605	0.152635	0.032669	2.98057e-06
rs116288649	A	G	0.0213291	0.1464	0.031002	2.33206e-06
rs3212690	C	T	0.0218141	0.144368	0.0306494	2.47326e-06
rs182505	C	T	0.960879	0.121536	0.0247127	8.745e-07
rs27154	G	A	0.678956	0.0462521	0.00997738	3.5573e-06
rs7745923	C	T	0.867607	-0.0634503	0.0135777	2.9664e-06
rs1983785	A	C	0.796379	0.0582375	0.0118482	8.86482e-07
rs929294	T	G	0.870986	-0.0638651	0.0136316	2.79866e-06
rs4409452	A	G	0.47001	0.0450713	0.00925998	1.1312e-06
rs146437037	T	C	0.139952	-0.0617304	0.0135015	4.82803e-06
rs9535583	C	T	0.0625874	-0.09177	0.0195678	2.73401e-06
rs185003380	T	A	0.173831	-0.0602246	0.0130015	3.61951e-06
rs34165946	T	C	0.164939	-0.0610644	0.012645	1.3712e-06
rs8062158	G	A	0.0147189	-0.205205	0.0402276	3.37676e-07
rs576340803	G	A	0.0165199	-0.187012	0.0391149	1.74345e-06
rs113664674	A	G	0.0137868	0.181712	0.0381566	1.91434e-06

## Sheet: S4
Additional file 1: Table S4. Instrument variables of heart failure
SNP	effect_allele	other_allele	eaf	beta	se	P_value
rs139435626	C	A	0.021606	0.148829	0.0310891	1.69153e-06
rs35839493	G	A	0.126825	-0.0788129	0.0141515	2.55882e-08
rs75650846	T	G	0.000657284	0.731228	0.158884	4.17907e-06
rs116288649	A	G	0.0213291	0.1464	0.031002	2.33206e-06
rs3212690	C	T	0.0218141	0.144368	0.0306494	2.47326e-06
rs182505	C	T	0.960879	0.121536	0.0247127	8.745e-07
rs27154	G	A	0.678956	0.0462521	0.00997738	3.5573e-06
rs7745923	C	T	0.867607	-0.0634503	0.0135777	2.9664e-06
rs1983785	A	C	0.796379	0.0582375	0.0118482	8.86482e-07
rs929294	T	G	0.870986	-0.0638651	0.0136316	2.79866e-06
rs4409452	A	G	0.47001	0.0450713	0.00925998	1.1312e-06
rs146437037	T	C	0.139952	-0.0617304	0.0135015	4.82803e-06
rs9535583	C	T	0.0625874	-0.09177	0.0195678	2.73401e-06
rs34165946	T	C	0.164939	-0.0610644	0.012645	1.3712e-06
rs8062158	G	A	0.0147189	-0.205205	0.0402276	3.37676e-07

## Sheet: S5
Additional file 1: Table S5. Instrument variables of atrial fibrillation
SNP	effect_allele	other_allele	eaf	beta	se	P_value
rs139435626	C	A	0.021606	0.148829	0.0310891	1.69153e-06
rs35839493	G	A	0.126825	-0.0788129	0.0141515	2.55882e-08
rs75650846	T	G	0.000657284	0.731228	0.158884	4.17907e-06
rs113117433	T	C	0.0194605	0.152635	0.032669	2.98057e-06
rs116288649	A	G	0.0213291	0.1464	0.031002	2.33206e-06
rs3212690	C	T	0.0218141	0.144368	0.0306494	2.47326e-06
rs182505	C	T	0.960879	0.121536	0.0247127	8.745e-07
rs27154	G	A	0.678956	0.0462521	0.00997738	3.5573e-06
rs7745923	C	T	0.867607	-0.0634503	0.0135777	2.9664e-06
rs1983785	A	C	0.796379	0.0582375	0.0118482	8.86482e-07
rs929294	T	G	0.870986	-0.0638651	0.0136316	2.79866e-06
rs146437037	T	C	0.139952	-0.0617304	0.0135015	4.82803e-06
rs9535583	C	T	0.0625874	-0.09177	0.0195678	2.73401e-06
rs34165946	T	C	0.164939	-0.0610644	0.012645	1.3712e-06
rs8062158	G	A	0.0147189	-0.205205	0.0402276	3.37676e-07
rs576340803	G	A	0.0165199	-0.187012	0.0391149	1.74345e-06
rs113664674	A	G	0.0137868	0.181712	0.0381566	1.91434e-06

## Sheet: S6
Additional file 1: Table S6. Instrument variables of stroke
SNP	effect_allele	other_allele	eaf	beta	se	P_value
rs139435626	C	A	0.021606	0.148829	0.0310891	1.69153e-06
rs35839493	G	A	0.126825	-0.0788129	0.0141515	2.55882e-08
rs75650846	T	G	0.000657284	0.731228	0.158884	4.17907e-06
rs113117433	T	C	0.0194605	0.152635	0.032669	2.98057e-06
rs116288649	A	G	0.0213291	0.1464	0.031002	2.33206e-06
rs3212690	C	T	0.0218141	0.144368	0.0306494	2.47326e-06
rs182505	C	T	0.960879	0.121536	0.0247127	8.745e-07
rs27154	G	A	0.678956	0.0462521	0.00997738	3.5573e-06
rs7745923	C	T	0.867607	-0.0634503	0.0135777	2.9664e-06
rs1983785	A	C	0.796379	0.0582375	0.0118482	8.86482e-07
rs929294	T	G	0.870986	-0.0638651	0.0136316	2.79866e-06
rs4409452	A	G	0.47001	0.0450713	0.00925998	1.1312e-06
rs146437037	T	C	0.139952	-0.0617304	0.0135015	4.82803e-06
rs9535583	C	T	0.0625874	-0.09177	0.0195678	2.73401e-06
rs185003380	T	A	0.173831	-0.0602246	0.0130015	3.61951e-06
rs34165946	T	C	0.164939	-0.0610644	0.012645	1.3712e-06
rs8062158	G	A	0.0147189	-0.205205	0.0402276	3.37676e-07

## Sheet: S7
Additional file 1: Table S7. Instrument variables of ischemic stroke
SNP	effect_allele	other_allele	eaf	beta	se	P_value
rs139435626	C	A	0.021606	0.148829	0.0310891	1.69153e-06
rs35839493	G	A	0.126825	-0.0788129	0.0141515	2.55882e-08
rs75650846	T	G	0.000657284	0.731228	0.158884	4.17907e-06
rs116288649	A	G	0.0213291	0.1464	0.031002	2.33206e-06
rs3212690	C	T	0.0218141	0.144368	0.0306494	2.47326e-06
rs182505	C	T	0.960879	0.121536	0.0247127	8.745e-07
rs27154	G	A	0.678956	0.0462521	0.00997738	3.5573e-06
rs7745923	C	T	0.867607	-0.0634503	0.0135777	2.9664e-06
rs1983785	A	C	0.796379	0.0582375	0.0118482	8.86482e-07
rs929294	T	G	0.870986	-0.0638651	0.0136316	2.79866e-06
rs4409452	A	G	0.47001	0.0450713	0.00925998	1.1312e-06
rs146437037	T	C	0.139952	-0.0617304	0.0135015	4.82803e-06
rs9535583	C	T	0.0625874	-0.09177	0.0195678	2.73401e-06
rs185003380	T	A	0.173831	-0.0602246	0.0130015	3.61951e-06
rs34165946	T	C	0.164939	-0.0610644	0.012645	1.3712e-06
rs8062158	G	A	0.0147189	-0.205205	0.0402276	3.37676e-07

## Sheet: S8
Additional file 1: Table S8. Instrument variables of large-artery atherosclerotic stroke
SNP	effect_allele	other_allele	eaf	beta	se	P_value
rs139435626	C	A	0.021606	0.148829	0.0310891	1.69153e-06
rs35839493	G	A	0.126825	-0.0788129	0.0141515	2.55882e-08
rs75650846	T	G	0.000657284	0.731228	0.158884	4.17907e-06
rs116288649	A	G	0.0213291	0.1464	0.031002	2.33206e-06
rs3212690	C	T	0.0218141	0.144368	0.0306494	2.47326e-06
rs182505	C	T	0.960879	0.121536	0.0247127	8.745e-07
rs27154	G	A	0.678956	0.0462521	0.00997738	3.5573e-06
rs7745923	C	T	0.867607	-0.0634503	0.0135777	2.9664e-06
rs1983785	A	C	0.796379	0.0582375	0.0118482	8.86482e-07
rs929294	T	G	0.870986	-0.0638651	0.0136316	2.79866e-06
rs4409452	A	G	0.47001	0.0450713	0.00925998	1.1312e-06
rs146437037	T	C	0.139952	-0.0617304	0.0135015	4.82803e-06
rs9535583	C	T	0.0625874	-0.09177	0.0195678	2.73401e-06
rs185003380	T	A	0.173831	-0.0602246	0.0130015	3.61951e-06
rs34165946	T	C	0.164939	-0.0610644	0.012645	1.3712e-06
rs8062158	G	A	0.0147189	-0.205205	0.0402276	3.37676e-07
rs113664674	A	G	0.0137868	0.181712	0.0381566	1.91434e-06

## Sheet: S9
Additional file 1: Table S9. Instrument variables of small-vessel stroke
SNP	effect_allele	other_allele	eaf	beta	se	P_value
rs139435626	C	A	0.021606	0.148829	0.0310891	1.69153e-06
rs35839493	G	A	0.126825	-0.0788129	0.0141515	2.55882e-08
rs75650846	T	G	0.000657284	0.731228	0.158884	4.17907e-06
rs116288649	A	G	0.0213291	0.1464	0.031002	2.33206e-06
rs3212690	C	T	0.0218141	0.144368	0.0306494	2.47326e-06
rs182505	C	T	0.960879	0.121536	0.0247127	8.745e-07
rs27154	G	A	0.678956	0.0462521	0.00997738	3.5573e-06
rs7745923	C	T	0.867607	-0.0634503	0.0135777	2.9664e-06
rs1983785	A	C	0.796379	0.0582375	0.0118482	8.86482e-07
rs929294	T	G	0.870986	-0.0638651	0.0136316	2.79866e-06
rs4409452	A	G	0.47001	0.0450713	0.00925998	1.1312e-06
rs146437037	T	C	0.139952	-0.0617304	0.0135015	4.82803e-06
rs9535583	C	T	0.0625874	-0.09177	0.0195678	2.73401e-06
rs185003380	T	A	0.173831	-0.0602246	0.0130015	3.61951e-06
rs34165946	T	C	0.164939	-0.0610644	0.012645	1.3712e-06
rs8062158	G	A	0.0147189	-0.205205	0.0402276	3.37676e-07
rs113664674	A	G	0.0137868	0.181712	0.0381566	1.91434e-06

## Sheet: S10
Additional file 1: Table S10. Instrument variables of cardioembolic stroke
SNP	effect_allele	other_allele	eaf	beta	se	P_value
rs139435626	C	A	0.021606	0.148829	0.0310891	1.69153e-06
rs35839493	G	A	0.126825	-0.0788129	0.0141515	2.55882e-08
rs75650846	T	G	0.000657284	0.731228	0.158884	4.17907e-06
rs116288649	A	G	0.0213291	0.1464	0.031002	2.33206e-06
rs3212690	C	T	0.0218141	0.144368	0.0306494	2.47326e-06
rs182505	C	T	0.960879	0.121536	0.0247127	8.745e-07
rs27154	G	A	0.678956	0.0462521	0.00997738	3.5573e-06
rs7745923	C	T	0.867607	-0.0634503	0.0135777	2.9664e-06
rs1983785	A	C	0.796379	0.0582375	0.0118482	8.86482e-07
rs929294	T	G	0.870986	-0.0638651	0.0136316	2.79866e-06
rs4409452	A	G	0.47001	0.0450713	0.00925998	1.1312e-06
rs146437037	T	C	0.139952	-0.0617304	0.0135015	4.82803e-06
rs9535583	C	T	0.0625874	-0.09177	0.0195678	2.73401e-06
rs185003380	T	A	0.173831	-0.0602246	0.0130015	3.61951e-06
rs34165946	T	C	0.164939	-0.0610644	0.012645	1.3712e-06
rs8062158	G	A	0.0147189	-0.205205	0.0402276	3.37676e-07
